# Supplementary figures and images for: Mitochondrial Transplantation’s Role in Rodent Skeletal Muscle Bioenergetics: Recharging the Engine of Aging
Source: MDPI journal article supplement (doi:10.3390/biom14040493), 2024-04-18

## Supplemental File

### Western Blots

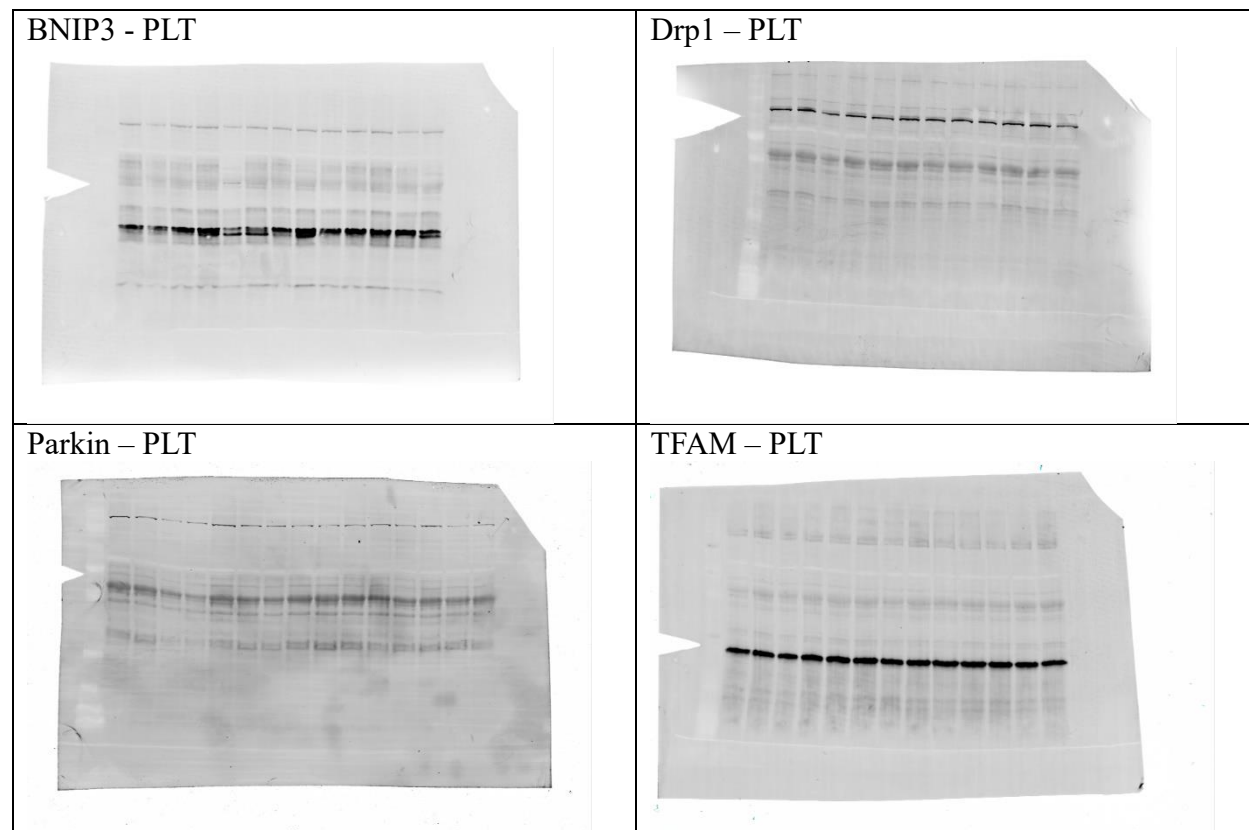

BNIP3 – SOL

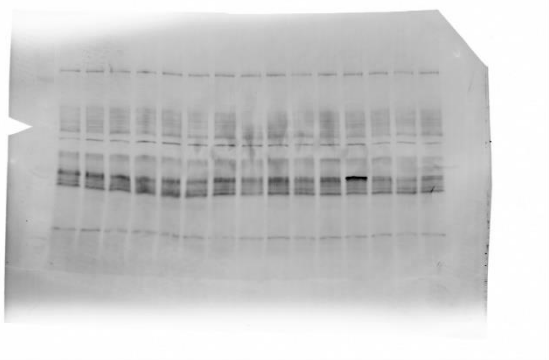

Drp1 – SOL

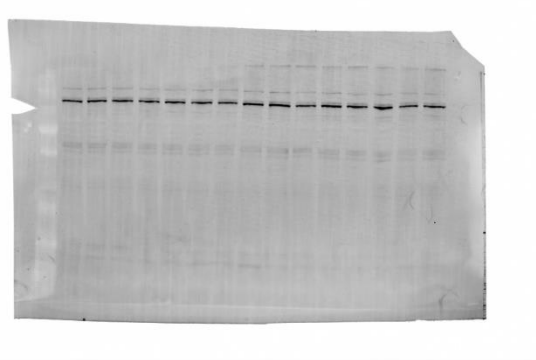

Parkin – SOL

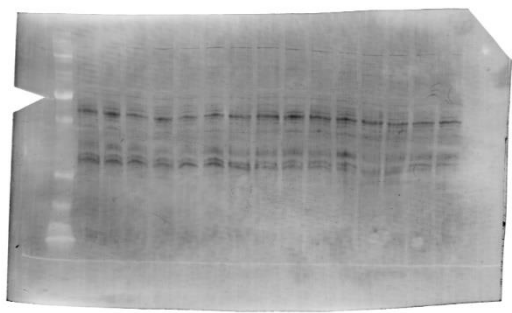

TFAM – SOL

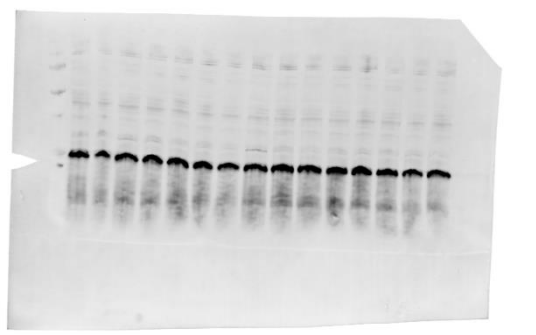

Supplement: s1 [file s1]
